# Supplementary material for: Ultralow thermal conductivity and anisotropic thermoelectric performance in layered materials LaMOCh (M = Cu, Ag; Ch = S, Se)
Source: Royal Society of Chemistry journal article supplement (doi:10.1039/d2cp02067j), 2022-01-01
Supplement: d2cp02067j1.pdf [file d2cp02067j1.pdf]

## Supplemental Material

Ultralow thermal conductivity and anisotropy thermoelectric performance  
in layered materials LaMOCh (M=Cu, Ag; Ch=S, Se)

Jiang-Jiang Ma,<sup>a,b,\*</sup> Qing-Yi Liu,<sup>a,b,c,\*</sup> Peng-Fei Liu,<sup>a,b</sup> Ping Zhang,<sup>d,e</sup>

Biplab Sanyal,<sup>f</sup> Tao Ouyang,<sup>c,‡</sup> and Bao-Tian Wang<sup>a,b,d,g,§</sup>

<sup>a</sup> *Institute of High Energy Physics, Chinese Academy of Sciences (CAS), Beijing  
100049, China*

<sup>b</sup> *Spallation Neutron Source Science Center (SNSRC), Dongguan 523803, China*

<sup>c</sup> *School of Physics and Optoelectronics, Xiangtan University, Xiangtan 411105,  
Hunan, People's Republic of China*

<sup>d</sup> *School of Physics and Physical Engineering, Qufu Normal University, Qufu 273165,  
China*

<sup>e</sup> *Institute of Applied Physics and Computational Mathematics, Beijing 100088, China*

<sup>f</sup> *Department of Physics and Astronomy, Materials Theory, Uppsala University, Box  
516, SE-75120 Uppsala, Sweden*

<sup>g</sup> *Collaborative Innovation Center of Extreme Optics, Shanxi University, Taiyuan,  
Shanxi 030006, China*

\* The first two authors contributed equally to this work.

‡ Corresponding authors. Email: [ouyangtao@xtu.edu.cn](mailto:ouyangtao@xtu.edu.cn);

§ Corresponding authors. Email: [wangbt@ihep.ac.cn](mailto:wangbt@ihep.ac.cn)

## 1. Test of vdW interactions

TABLE S1. Calculated lattice constants by different vdW interactions.

| Compound | vdW interactions     | a&b (Å) | c (Å) |
|----------|----------------------|---------|-------|
| LaCuOS   | Expt. <sup>[1]</sup> | 3.99    | 8.52  |
|          | no vdW               | 4.00    | 8.55  |
|          | optB86b              | 4.11    | 8.75  |
|          | optB88               | 3.97    | 8.43  |
|          | DFT-D3               | 3.95    | 8.49  |
| LaCuOSe  | Expt. <sup>[1]</sup> | 4.07    | 8.80  |
|          | no vdW               | 4.07    | 8.86  |
|          | optB86b              | 4.17    | 9.22  |
|          | optB88               | 4.05    | 8.70  |
|          | DFT-D3               | 4.02    | 8.79  |
| LaAgOS   | Expt. <sup>[2]</sup> | 4.07    | 9.10  |
|          | no vdW               | 4.09    | 9.09  |
|          | optB86b              | 4.15    | 9.38  |
|          | optB88               | 4.05    | 8.93  |
|          | DFT-D3               | 4.04    | 9.03  |

The optimized lattice constants without the van der Waals (vdW) interactions are in the best agreement with the experimental values. Using optB86b overestimates the lattice constants while using optB88 and DFT-D3 underestimates them.

## 2. Heat Transport Properties

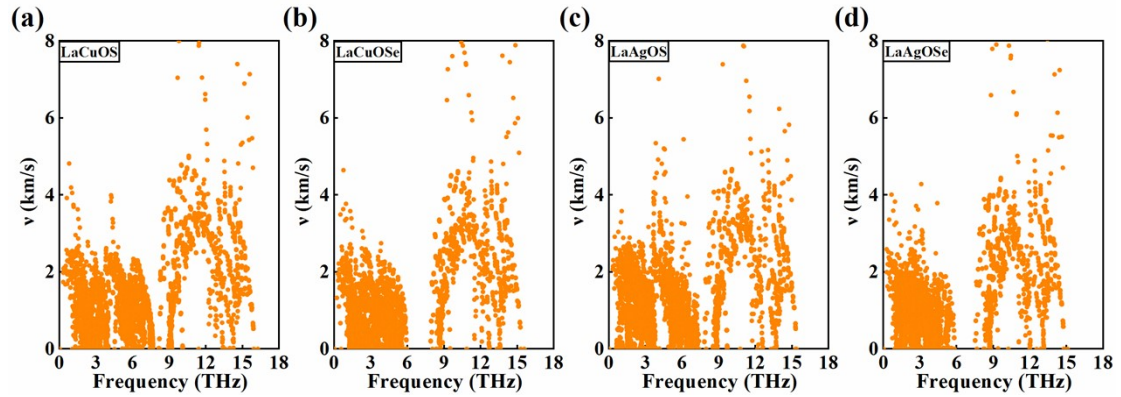

Figure S1. Calculated phonon group velocity (a) - (d) of LaMOCh at 300 K.

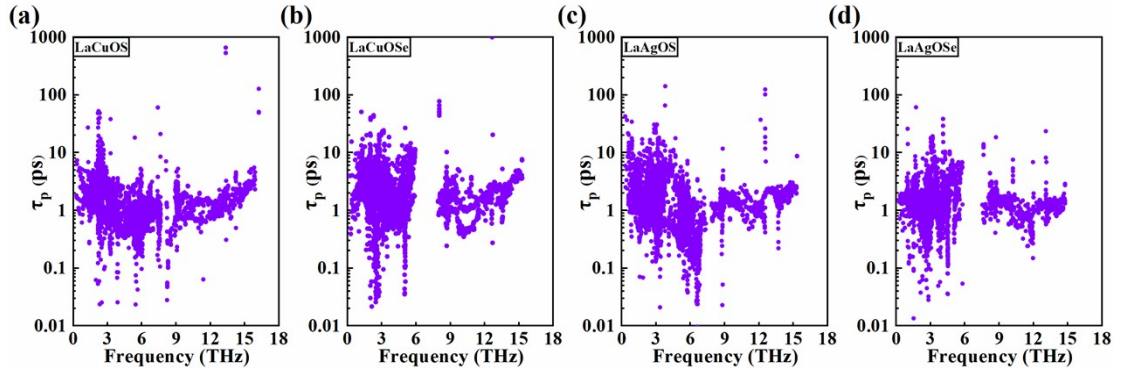

**Figure S2.** Calculated phonon relaxation time (a) - (d) of LaMOCh at 300 K.

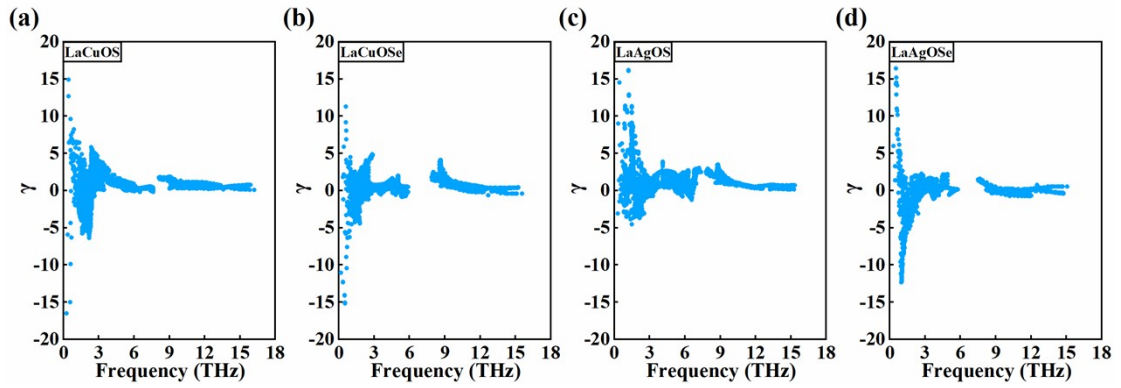

**Figure S3.** Calculated Grüneisen parameters (a) - (d) of LaMOCh at 300 K.

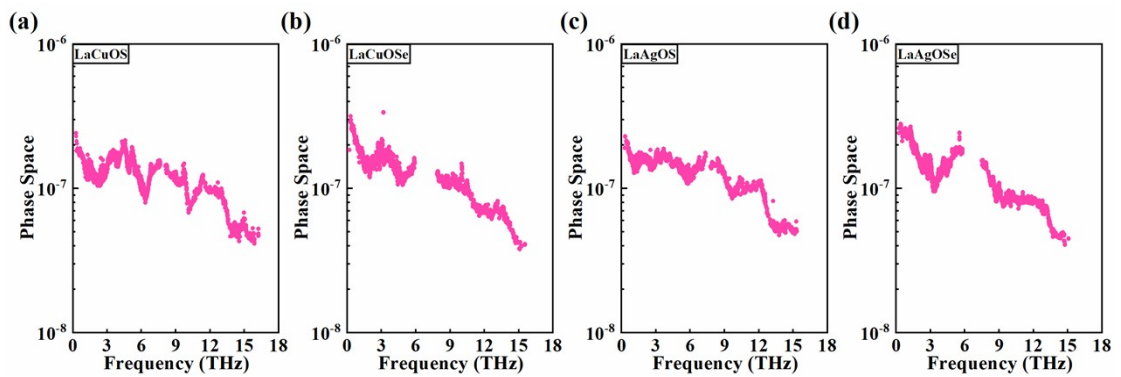

**Figure S4.** Calculated three phonon scattering phase space (a) - (d) of LaMOCh at 300 K.

### 3. Electronic Transport Properties

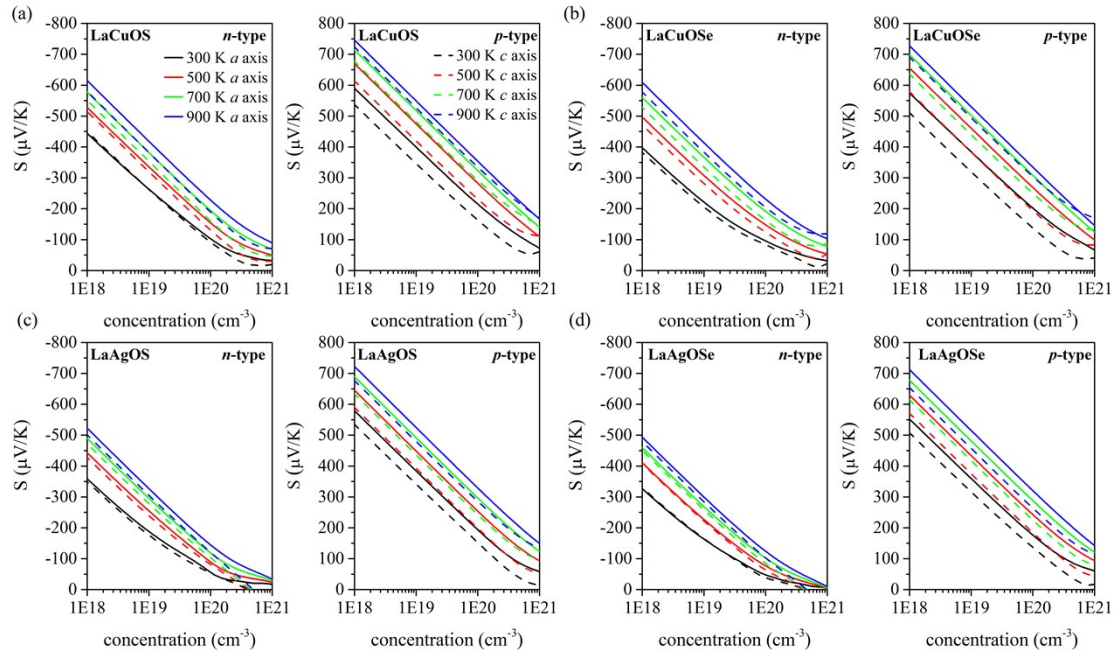

**Figure S5.** Calculated Seebeck coefficients (a) - (d) of LaMOCh.

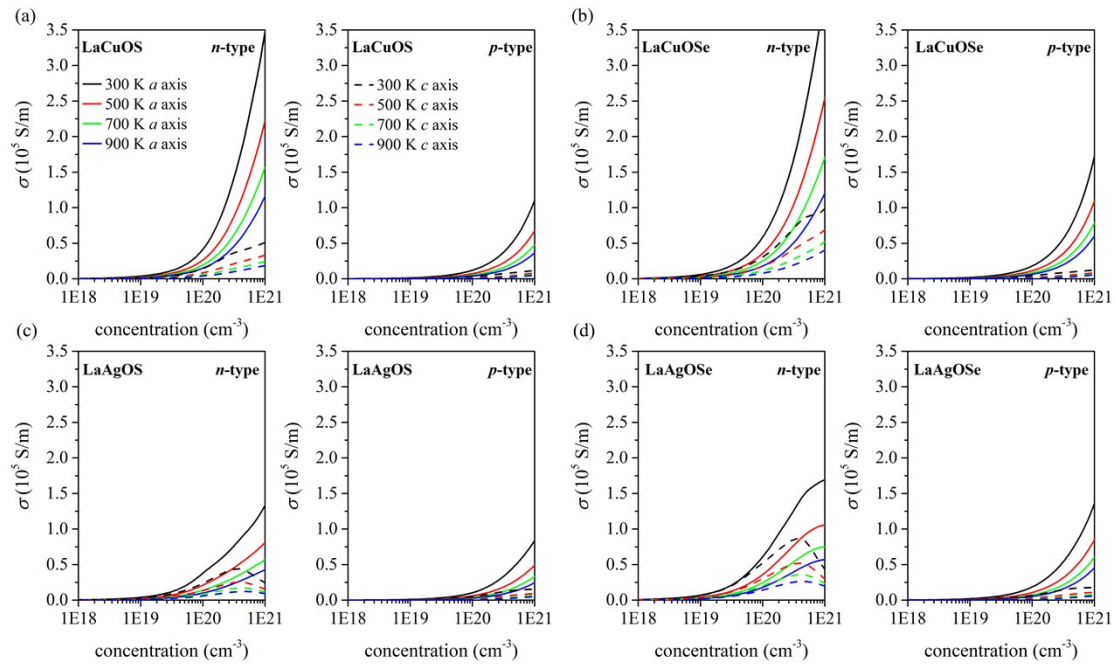

**Figure S6.** Calculated electrical conductivity (a) - (d) of LaMOCh.

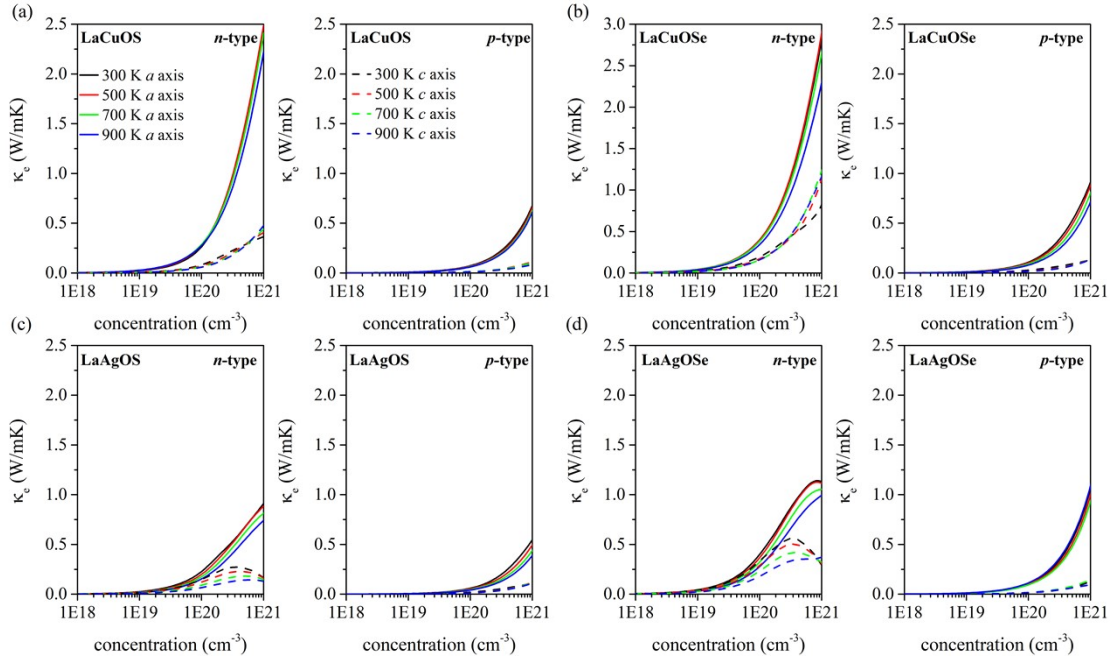

**Figure S7.** Calculated electrical thermal conductivity (a) - (d) of LaMOCh.

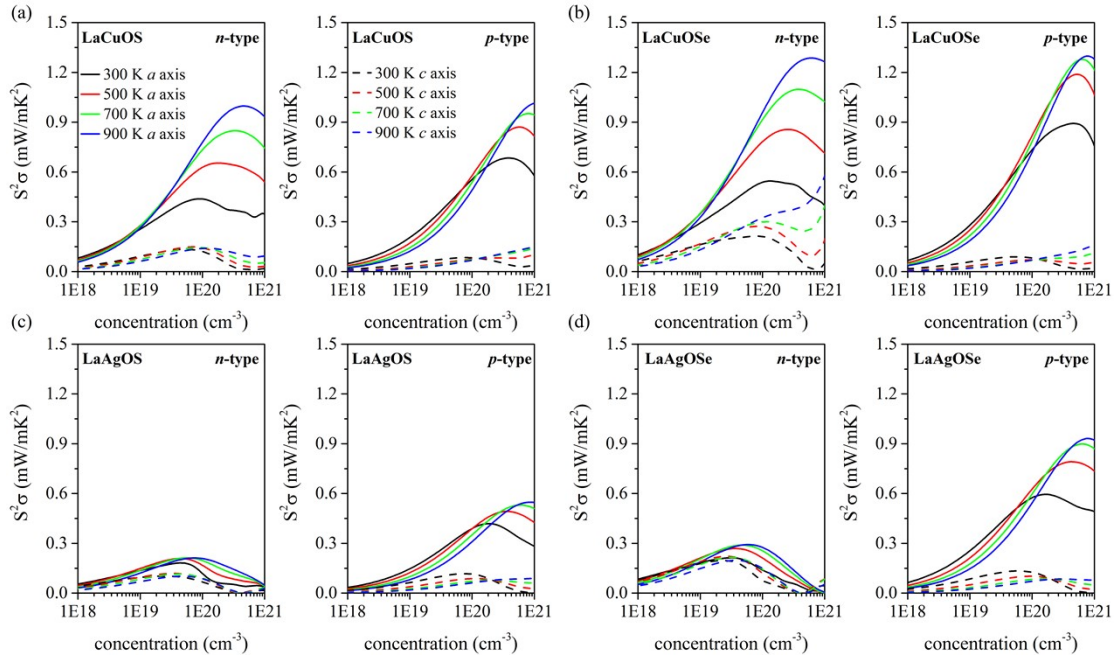

**Figure S8.** Calculated power factor (a) - (d) of LaMOCh.

#### 4. Figure of Merit

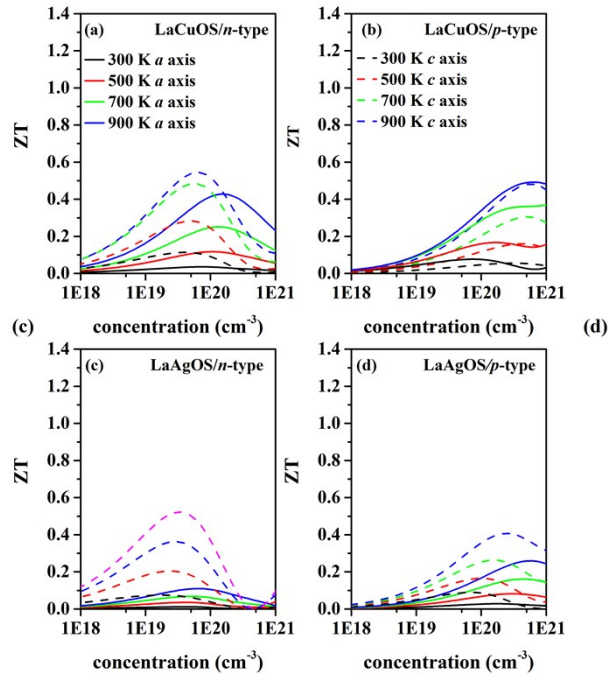

**Figure S9.** ZT value as function of carrier concentrations for LaMOS.

## Reference

- [1] K. Ueda and H. Hosono, *Thin Solid Films* **411**, 115 (2002).
- [2] M. Palazzi, C. Carcaly, and J. Flahaut, *J. Solid State Chem.* **35**, 150 (1980).
